# Supplementary material
Source: Springer Nature journal article supplement (https://www.springermedizin.de/resource/supplementary/12889_2011_3921_MOESM2_ESM.pdf/9490978)

**Number of  
facilities per  
100,000 persons  
living with HIV**

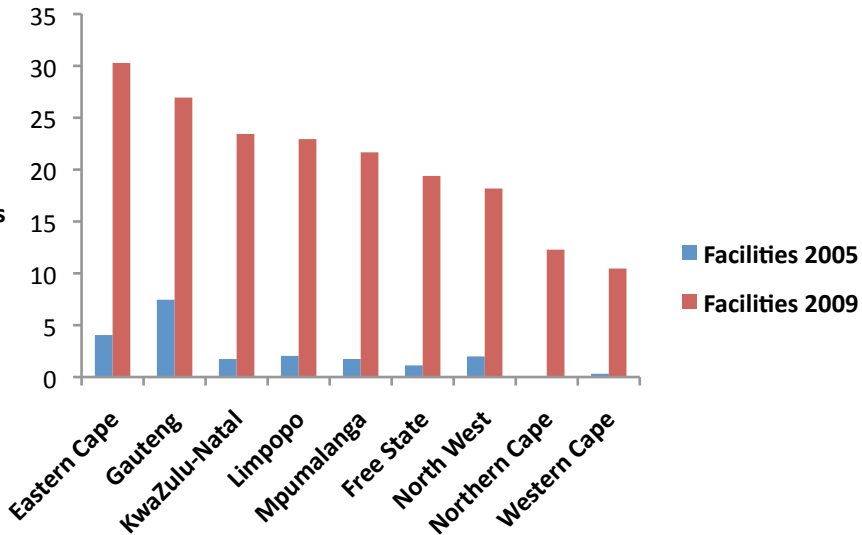

Supplement: MOESM2 [file 9490978]
